# Supplementary material for: Phosphoproteome Profiling Reveals Multifunctional Protein NPM1 as part of the Irradiation Response of Tumor Cells
Source: PubMed Central journal article supplement — Transl Oncol. 2018 Nov 16;12(2):308–19. doi: 10.1016/j.tranon.2018.10.015 (PMC6240713; doi:10.1016/j.tranon.2018.10.015), 2018-11-16

**Figure S1**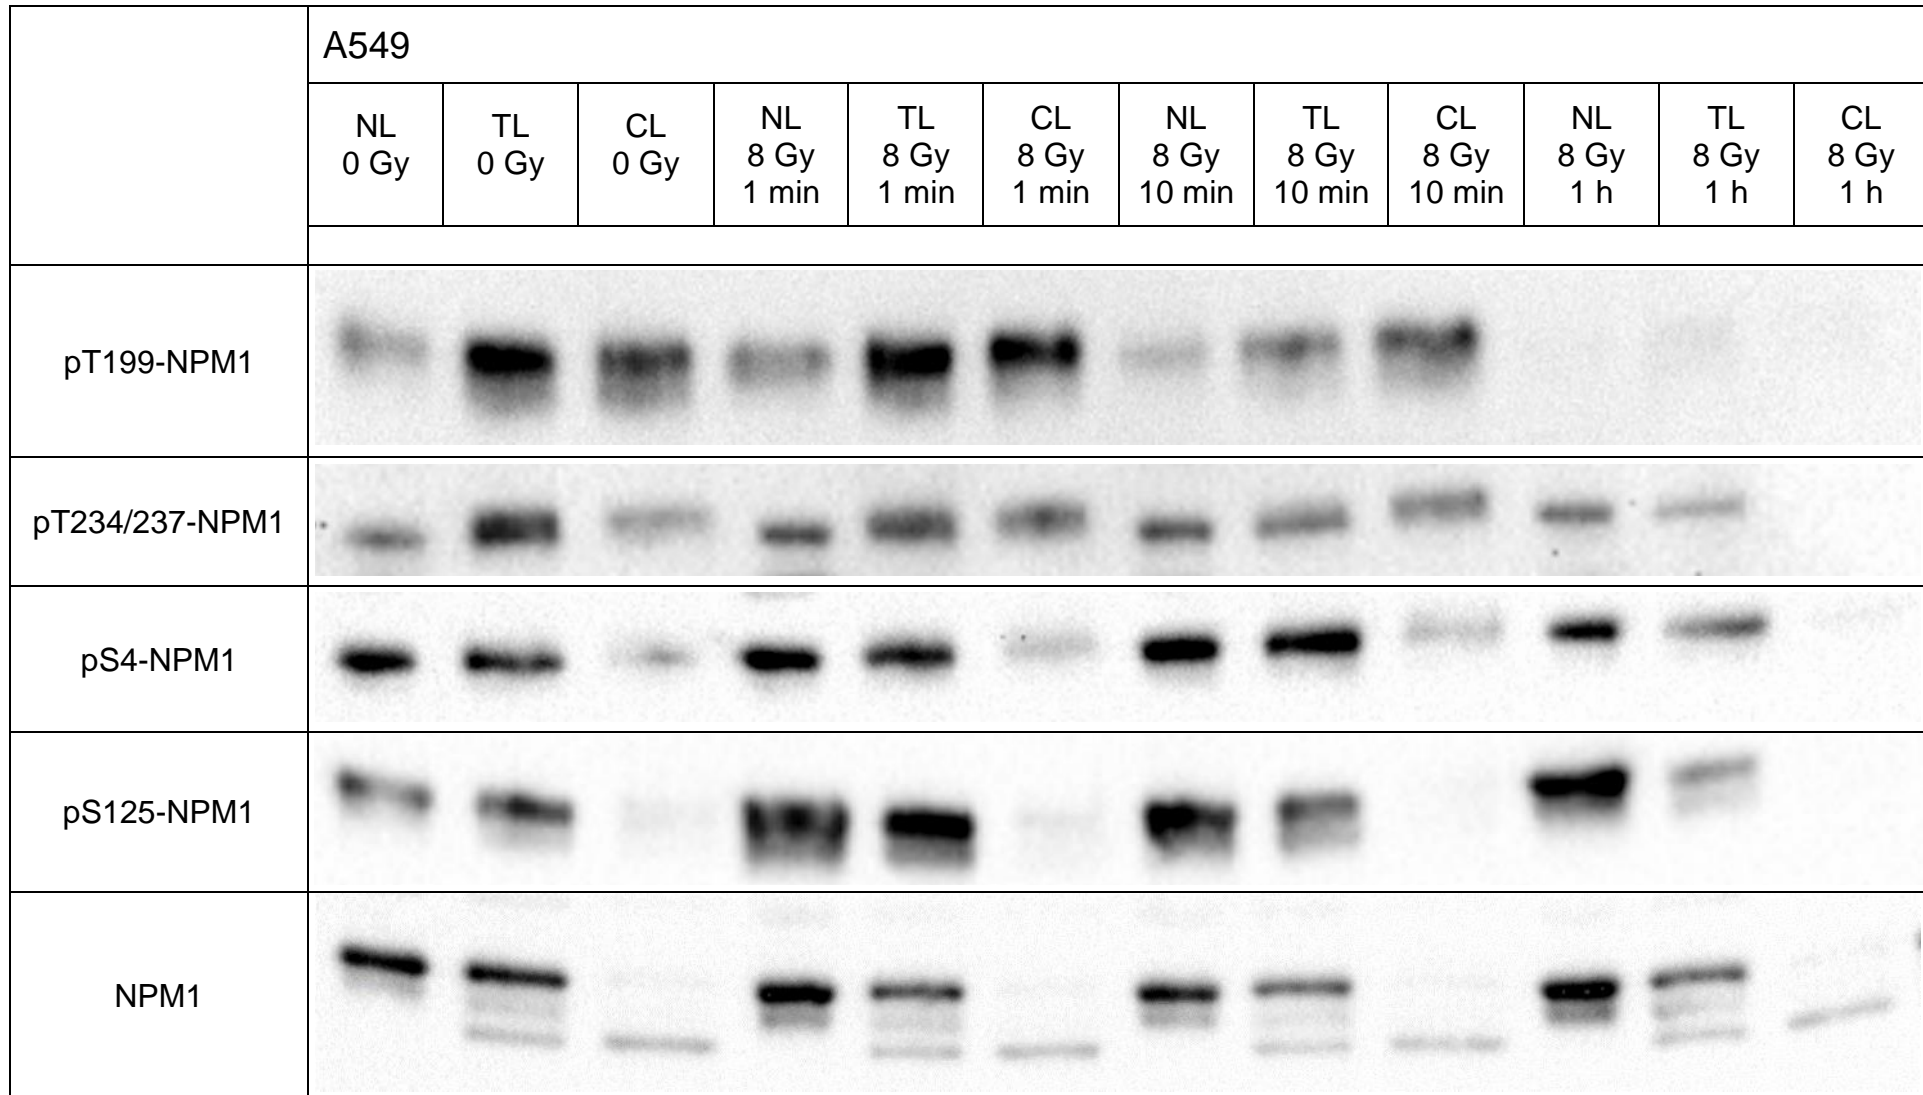

NL = nuclear lysate

TL = total lysate

CL = cytoplasmic lysate

**Figure S2**

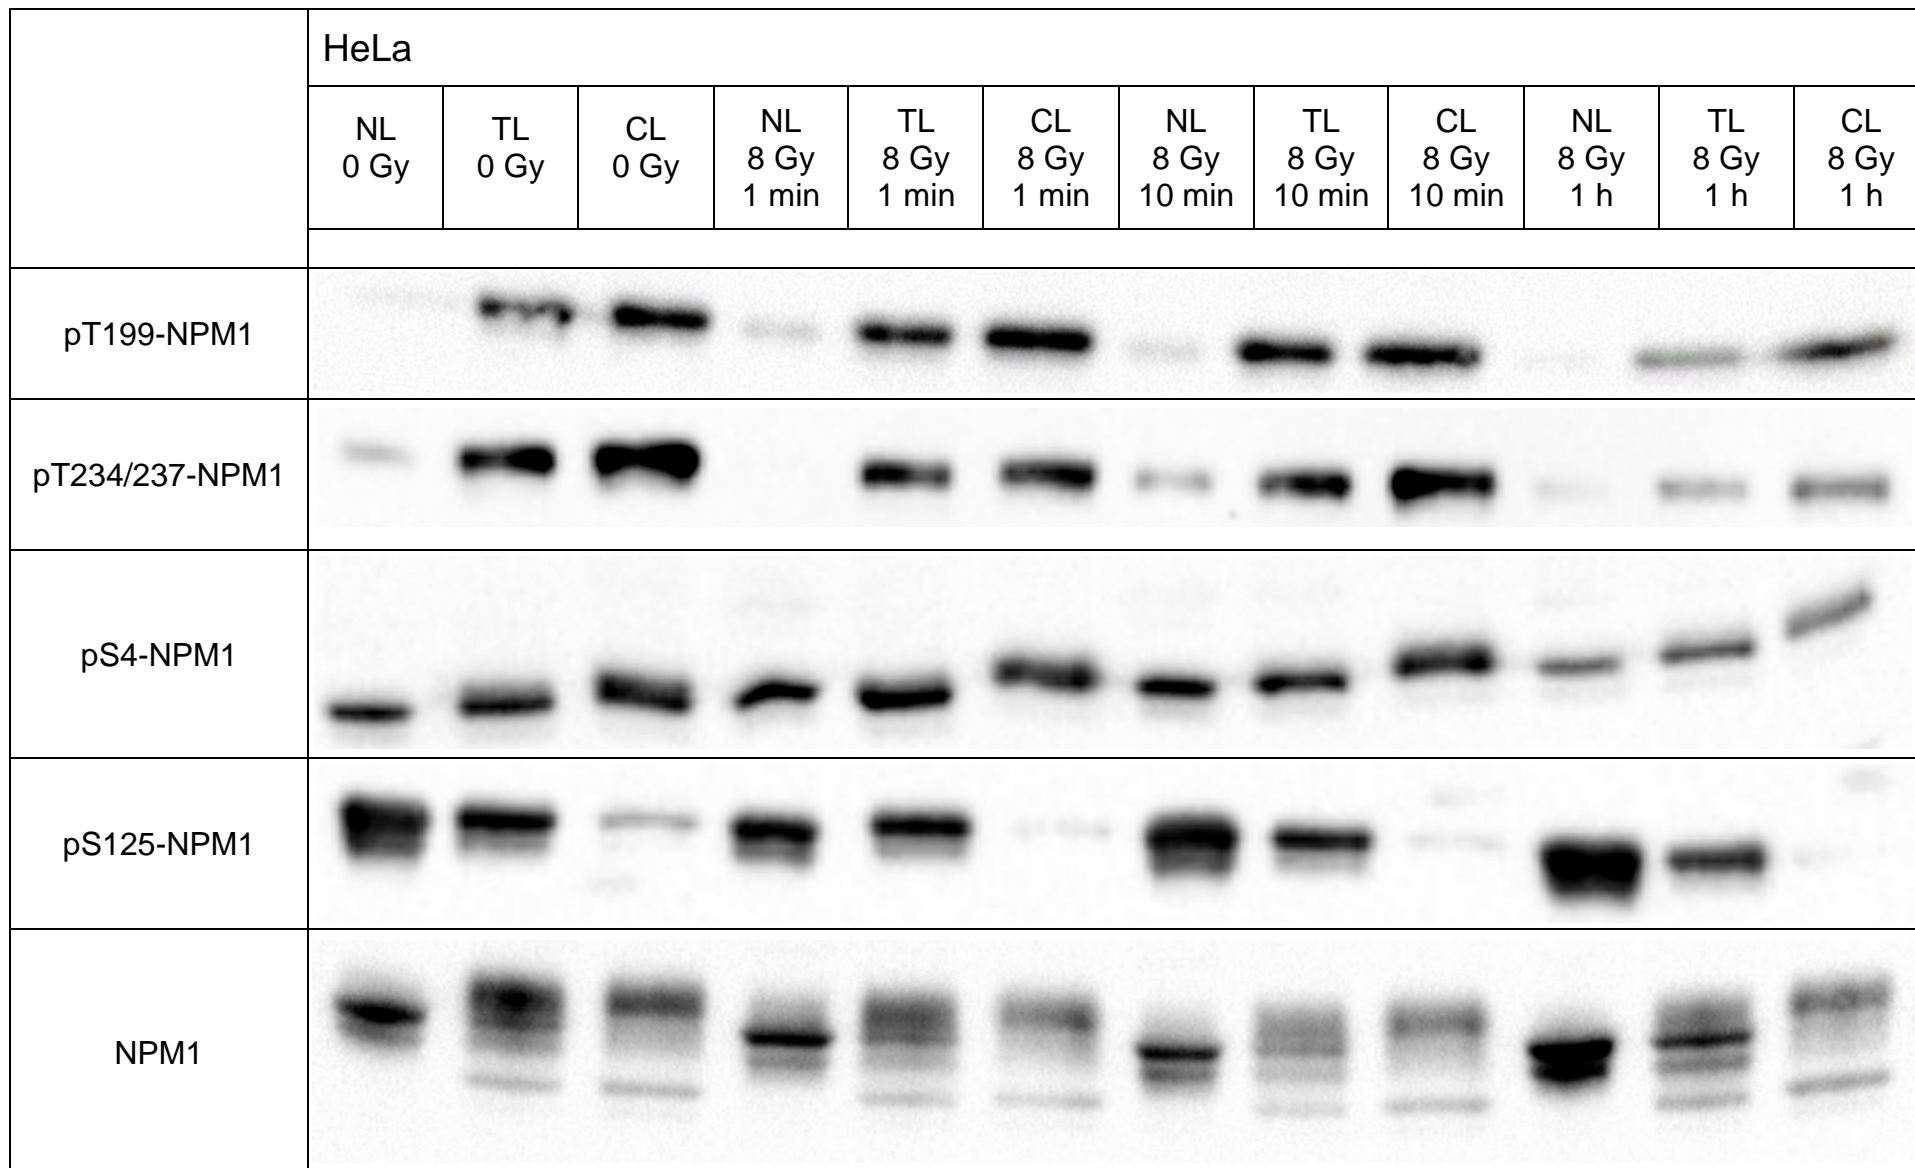

NL = nuclear lysate  
 TL = total lysate  
 CL = cytoplasmic lysate

**Figure S3**

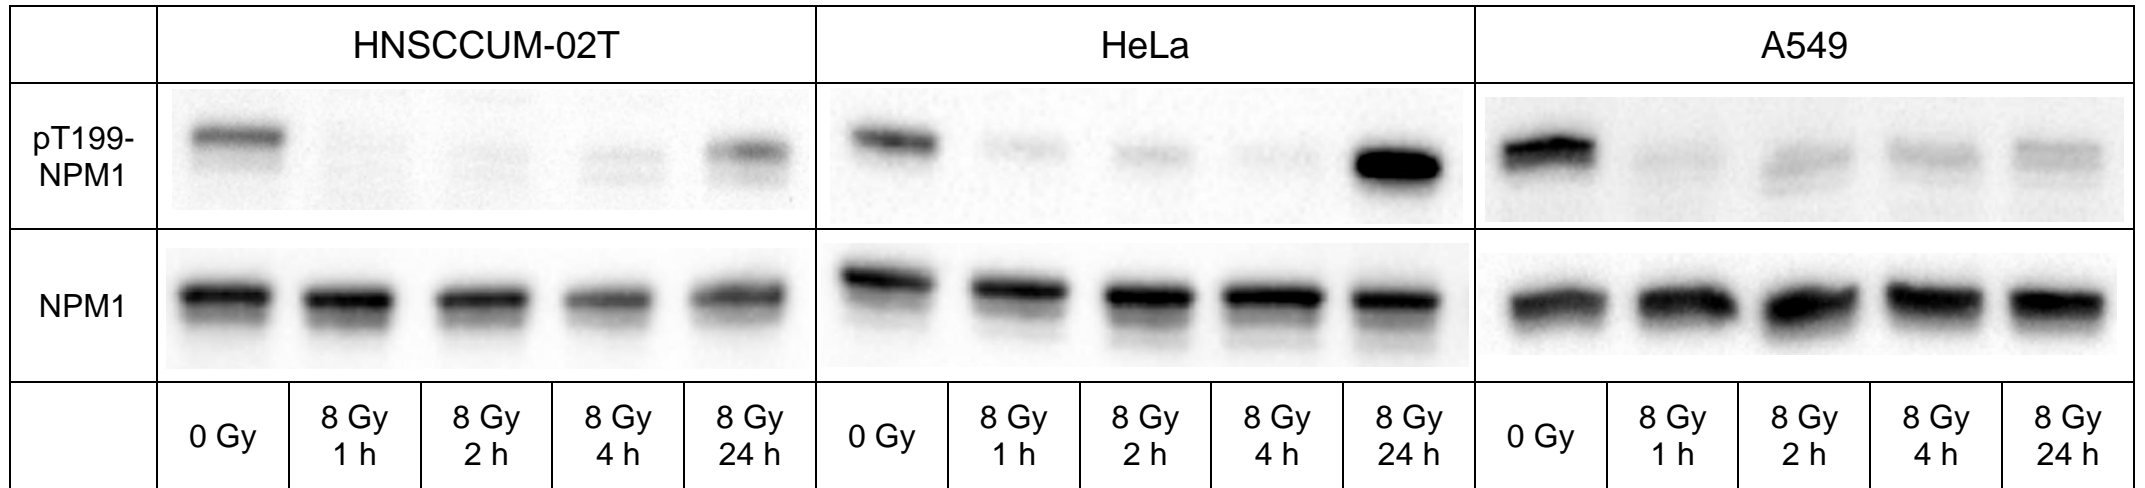

Supplement: mmc1.pdf [file mmc1.pdf]
